# Supplementary material for: The Cell-Cycle State of Stem Cells Determines Cell Fate Propensity
Source: PubMed Central journal article supplement (PMC3898746; doi:10.1016/j.cell.2013.08.031), 2013-09-26
Supplement: mmc1.pdf [file mmc1.pdf]

Table S1. Q-CPR Primers, Related to Experimental Procedures

| Gene     | Primer name | Sequence                    |
|----------|-------------|-----------------------------|
| PBGD     | PBGDF       | GGAGCCATGTCTGGTAACGG        |
|          | PBGDR       | CCACGCGAATCACTCTCATCT       |
| Oct4     | Pou5F_F     | AGTGAGAGGCAACCTGGAGA        |
|          | Pou5F_R     | ACACTCGGACCACATCCTTC        |
| Nanog    | NanogF      | CATGAGTGTGGATCCAGCTTG       |
|          | NanogR      | CCTGAATAAGCAGATCCATGG       |
| Sox2     | hSox2F      | TGGACAGTTACGCGCACAT         |
|          | hSox2R      | CGAGTAGGACATGCTGTAGGT       |
| Nestin   | NestinF     | GAAACAGCCATAGAGGGCAAA       |
|          | NestinR     | TGGTTTTCCAGAGTCTTCAGTGA     |
| Olig3    | Olig3F      | AGCCGTCTCAACTCGGTCT         |
|          | Olig3R      | CATGGCTAGGTTCAAGGTCGTG      |
| GBX2     | GBX2F       | GTTCCACTGCAAAAAGTACCTCT     |
|          | GBX2R       | GGGACGACGATCTTAGGGTTC       |
| Sip1     | Sip1F       | CGCTTGACATCACTGAAGGA        |
|          | Sip1R       | CTTGCCACACTCTGTGCATT        |
| Pax6     | hPax6F      | CTTTGCTTGGGAAATCCGAG        |
|          | hPax6R      | AGCCAGGTTGCGAAGAACTC        |
| Sox1     | Sox1Q       | QUANTITECT PRIMERS (QIAGEN) |
| GSC      | DAGSCF      | GAGGAGAAAGTGGAGGTCTGGTT     |
|          | DAGSCR      | CTCTGATGAGGACCGCTTCTG       |
| Brachury | DABraF      | TGCTTCCCTGAGACCCAGTT        |
|          | DABraR      | GATCACTTCTTTCTTTGCATCAAG    |
| Eomes    | hEomesF     | ATCATTACGAAACAGGGCAGGC      |
|          | hEomesR     | CGGGGTTGGTATTTGTGTAAGG      |
| Sox17    | hsox17F     | CGCACGGAATTTGAACAGTA        |
|          | hsox17R     | GGATCAGGGACCTGTCACAC        |
| MixL1    | hMixL1F     | GGTACCCCGACATCCACTTG        |
|          | hMixL1R     | TAATCTCCGGCCTAGCCAAA        |
| Mesp1    | Mesp1F      | GAAGTGGTTCCTTGGCAGAC        |
|          | Mesp1R      | TCCTGCTTGCCTCAAAGTGT        |
| Mesp2    | Mesp2F      | AGCTTGGGTGCCTCCTTATT        |
|          | Mesp2R      | TGCTTCCCTGAAAGACATCA        |
| Flk-1    | Flk1F       | TTTTTGGCCTTGTTCTGTCC        |
|          | FLK1R       | TCATTGTTCCCAGCATTCA         |
| Tbx6     | Tbx6F       | AAGTACCAACCCCGCATACA        |
|          | Tbx6R       | TAGGCTGTCACGGAGATGAA        |
| Hoxb1    | Hoxb1F      | AGAACCGACGAATGAAGCAG        |

|       |         |                       |
|-------|---------|-----------------------|
|       | Hoxb1R  | GACTGGTCTGAGGCATCTCC  |
| Hand1 | HAND1 F | GTGCGTCCTTTAATCCTCTTC |
|       | HAND1 R | GTGAGAGCAAGCGGAAAAG   |
| CCND1 | CCND1F  | GCCGTCCATGCGGAAGATC   |
|       | CCND1R  | CCTCCTCCTCGCACTTCTGT  |
| CCND2 | CCND2F  | TGAGGCGGTGTAGGACAGG   |
|       | CCND2R  | ATATCCCGCACGTCTGTAGG  |
| CCND3 | CCND3F  | CATGTACCCGCCATCCAT    |
|       | CCND3R  | AGCTTCGATCTGCTCCTGAC  |

Table S2. CHIP Primers, Related to Experimental Procedures

| Gene        | Primer name | Protein CHIP                 | Sequence                |
|-------------|-------------|------------------------------|-------------------------|
| EOMES       | C_eomes1aF  | Smad2/3 CHIP                 | GTTCCGGCCGATTACTTGTC    |
|             | C_eomes1aR  | Smad2/3 CHIP                 | GGGAGGCTTCCGACTACTCA    |
| Mix11       | C_MixL11F   | Smad2/3 CHIP                 | TTTGATGAGGACAGACGGGA    |
|             | C_MixL11R   | Smad2/3 CHIP                 | CGAAGGACTATTTGCCTGGG    |
| GSC         | C_GSC1F     | Smad2/3 CHIP                 | GTGCAGGGCACAGTTCAGAG    |
|             | C_GSC1R     | Smad2/3 CHIP                 | TATGGGACGCTTTGAATCCC    |
| Neg Control | Smad7-veF   | Smad2/3 and Cyclin D<br>CHIP | ACCCTGATAGGAAGAGGGGAAG  |
|             | Smad7-veR   | Smad2/3 and Cyclin D<br>CHIP | TCACACACACTCCTGACAAGTGA |

Table S3. Antibodies, Related to Experimental Procedures

| Antibody raised against                | Catalog number | Company       |
|----------------------------------------|----------------|---------------|
| Actin, clone C4                        | MAB1501        | Chemicon      |
| Brachyury (T)                          | af2085         | R&D Systems   |
| Cdx2                                   | MU392A-UC      | BioGenex      |
| Cyclin D1 (DCS-6)                      | sc-20044       | Santa Cruz    |
| Cyclin D1                              | sc-246         | Santa Cruz    |
| Cyclin D2 (C-17)                       | sc-181         | Santa Cruz    |
| Cyclin D3 (D-7)                        | sc-6283        | Santa Cruz    |
| Cyclin D3                              | sc-6283        | Santa Cruz    |
| EOMES                                  | ab23345        | R&D Systems   |
| Gata4 (G-4)                            | sc-25310       | Santa Cruz    |
| Histone H3                             | ab1791         | Abcam         |
| Nanog                                  | af1997         | R&D Systems   |
| Nestin (Rat-401)                       | sc-33677       | Santa Cruz    |
| Oct-3/4 (C-10)                         | sc-5279        | Santa Cruz    |
| Pax6                                   | PRB-278P-100   | Covance       |
| P300                                   | sc-584         | Santa Cruz    |
| Sox1                                   | AF3369         | R&D Systems   |
| Sox17                                  | AF1924         | R&D Systems   |
| Sox2                                   | AF2018         | R&D Systems   |
| Sox7                                   | AF2766         | R&D Systems   |
| CXCR4                                  | MAB173         | R&D Systems   |
| Tra-1-60                               | sc-21705       | Santa Cruz    |
| Smad2/3                                | sc-8332        | Santa Cruz    |
| Smad2/3                                | AF3797         | R&D Systems   |
| Smad3 (phospho-Thr179)                 | A1003-ABT      | Assay Biotech |
| Smad3 (phospho-Thr204)                 | A1004-ABT      | Assay Biotech |
| Smad3 (phospho-Thr208)                 | A1005-ABT      | Assay Biotech |
| Smad3 (phospho-Thr213)                 | A1007-ABT      | Assay Biotech |
| Smad2 (phospho-Thr220)                 | A1000-ABT      | Assay Biotech |
| Smad2 (phospho-Ser250)                 | A0998-ABT      | Assay Biotech |
| Alexa Fluor 647 donkey $\alpha$ -mouse | A31571         | Invitrogen    |
| Alexa Fluor 647 donkey $\alpha$ -goat  | A21447         | Invitrogen    |

Table S4. Overall Cell Output in Cyclin D Double Knockdown or Cyclin D Overexpressing Cells after Endoderm, Mesoderm, and Neuroectoderm Differentiation, Related to Figure S3

|                    |                  | Total cell number per cm <sup>2</sup> | +/-   | Total cell number per cm <sup>2</sup> | +/-   | Total cell number per cm <sup>2</sup> | +/-   | Total cell number per cm <sup>2</sup> | +/-   |
|--------------------|------------------|---------------------------------------|-------|---------------------------------------|-------|---------------------------------------|-------|---------------------------------------|-------|
|                    |                  | Scramble                              |       | D1D3                                  |       | D1D2                                  |       | D2D3                                  |       |
| Cyclin D Double KD | Undifferentiated | 119658                                | 6352  | 108568                                | 5260  | 115279                                | 7128  | 122684                                | 7844  |
|                    | Endoderm         | 84711                                 | 5367  | 72636                                 | 5399  | 70336                                 | 6704  | 65614                                 | 3250  |
|                    | Mesoderm         | 367895                                | 31389 | 298670                                | 17241 | 252014                                | 14193 | 222073                                | 15957 |
|                    | Neuroectoderm    | 137179                                | 9127  | 96574                                 | 9102  | 53783                                 | 3898  | 40466                                 | 2290  |
|                    |                  |                                       |       |                                       |       |                                       |       |                                       |       |
|                    |                  | GFP                                   |       | Cyclin D1                             |       | Cyclin D2                             |       | Cyclin D3                             |       |
| Cyclin D OE        | Undifferentiated | 124497                                | 7530  | 110680                                | 6846  | 102970                                | 8254  | 94378                                 | 5612  |
|                    | Endoderm         | 90763                                 | 6936  | 58190                                 | 3679  | 39878                                 | 1695  | 30311                                 | 2227  |
|                    | Mesoderm         | 131703                                | 6243  | 88953                                 | 6324  | 58702                                 | 4943  | 41949                                 | 3868  |
|                    | Neuroectoderm    | 269605                                | 16831 | 278489                                | 11727 | 278340                                | 15982 | 247273                                | 15389 |

Table S5. CDK4/6 Inhibition Does Not Significantly Alter the Cell Output during Differentiation, Related to Figure 7

|       |                  | - CDKi                                |       | + CDKi                                |       |
|-------|------------------|---------------------------------------|-------|---------------------------------------|-------|
|       |                  | Total cell number per cm <sup>2</sup> | +/-   | Total cell number per cm <sup>2</sup> | +/-   |
| H9    | Undifferentiated | 113526                                | 5624  | 113526                                | 5624  |
|       | Endoderm         | 82632                                 | 6141  | 72173                                 | 4500  |
|       | Pancreatic       | 302632                                | 25491 | 258546                                | 26973 |
|       | Hepatic          | 140789                                | 15818 | 115627                                | 8362  |
| Bob7  | Undifferentiated | 95789                                 | 6396  | 95789                                 | 6396  |
|       | Endoderm         | 76579                                 | 5225  | 65416                                 | 6825  |
|       | Pancreatic       | 253947                                | 23930 | 234229                                | 19289 |
|       | Hepatic          | 134263                                | 18441 | 105063                                | 7505  |
| BBHX8 | Undifferentiated | 108026                                | 4433  | 108026                                | 4433  |
|       | Endoderm         | 85526                                 | 6784  | 87941                                 | 7672  |
|       | Pancreatic       | 284211                                | 21129 | 219825                                | 12874 |
|       | Hepatic          | 137368                                | 14609 | 116112                                | 9575  |
| IPS40 | Undifferentiated | 98316                                 | 5106  | 98316                                 | 5106  |
|       | Endoderm         | 72632                                 | 6990  | 66324                                 | 5058  |
|       | Pancreatic       | 268421                                | 16032 | 226306                                | 11932 |
|       | Hepatic          | 125263                                | 9185  | 109284                                | 13394 |

Cells were differentiated into endoderm with CDK4/6 inhibitor and further to pancreatic and hepatic cells in H9, Bob7, BBHX8 or IPS40 cells and then counted to estimate cell numbers.
